# Supplementary material for: Nanofluorapatite Hydrogels in the Treatment of Dentin Hypersensitivity: A Study of Physiochemical Properties and Fluoride Release
Source: MDPI journal article supplement (doi:10.3390/gels9040271), 2023-03-25
Supplement: s1 [file s1]

Article

# Nanofluorapatite Hydrogels in the Treatment of Dentin Hypersensitivity: A Study of Physiochemical Properties and Fluoride Release

Katarzyna Wiglusz <sup>1,\*</sup>, Maciej Dobrzynski <sup>2</sup>, Martina Gutbier <sup>2</sup> and Rafal J. Wiglusz <sup>3,\*</sup>

## Supplementary Materials

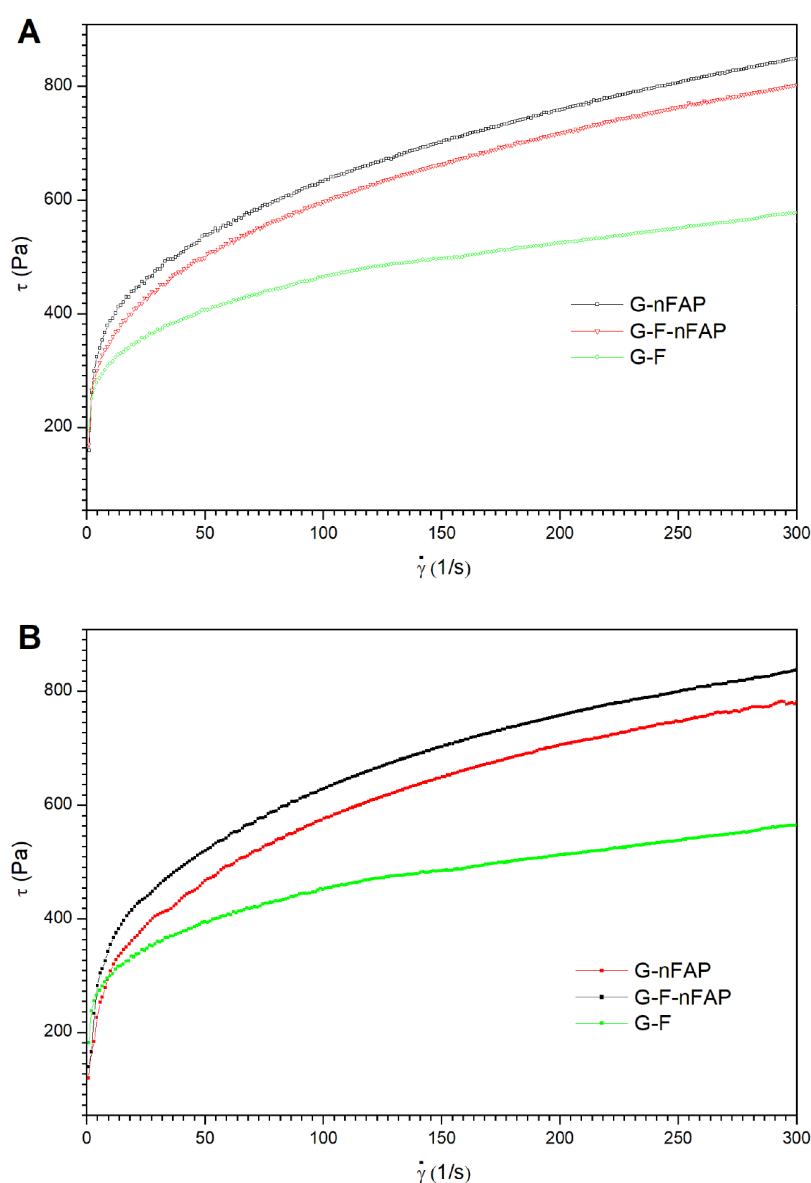

**Figure S1.** Rheograms of gels G-F, G-F-nFAP, G-nFAP at 25 (A) and 37°C (B), 1 week after preparation. The shear stress as a function of shear rate.

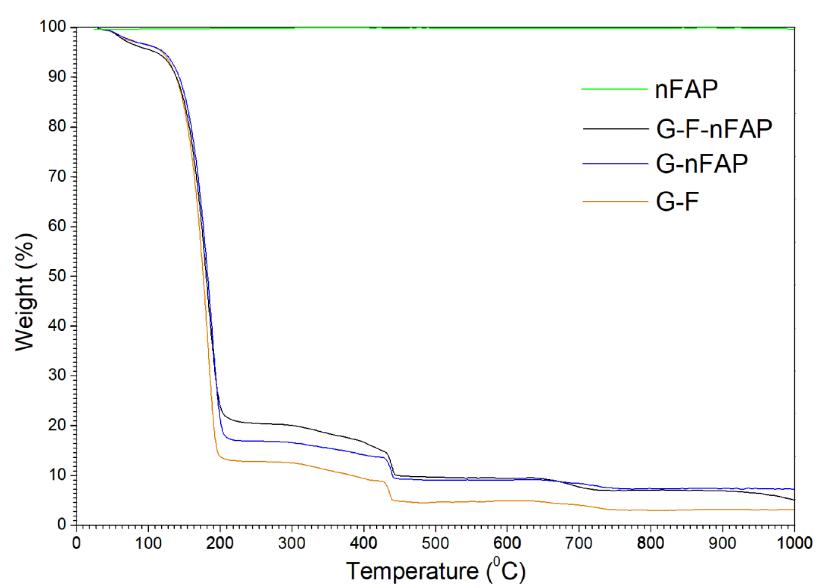

**Figure S2.** TGA thermograms of the G-F gel, G-F-nFAP gel, G-nFAP gel, G nFAP, and FAP.
